# Supplementary figures and images for: Increased skeletal muscle-specific microRNA in the blood of patients with COPD
Source: HighWire-hosted journal article supplement (doi:10.1136/thoraxjnl-2012-203129), 2013-06-28

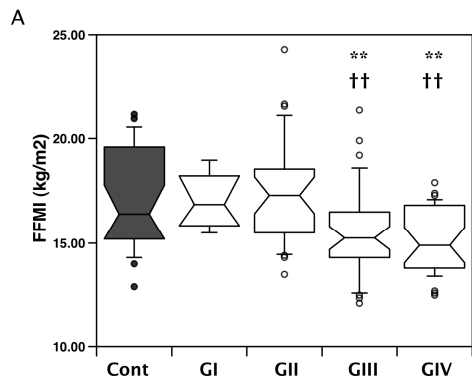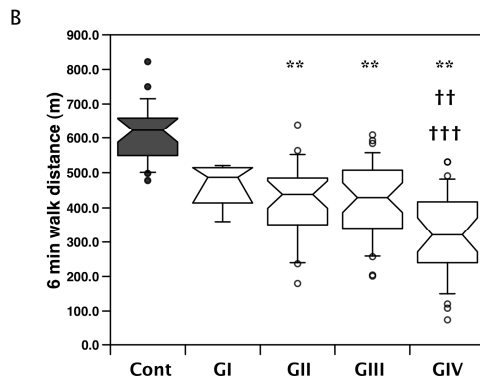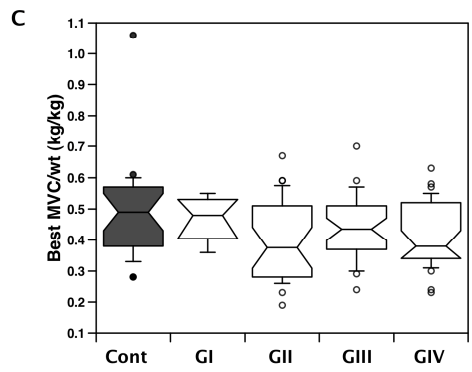

Donaldson Figure S1

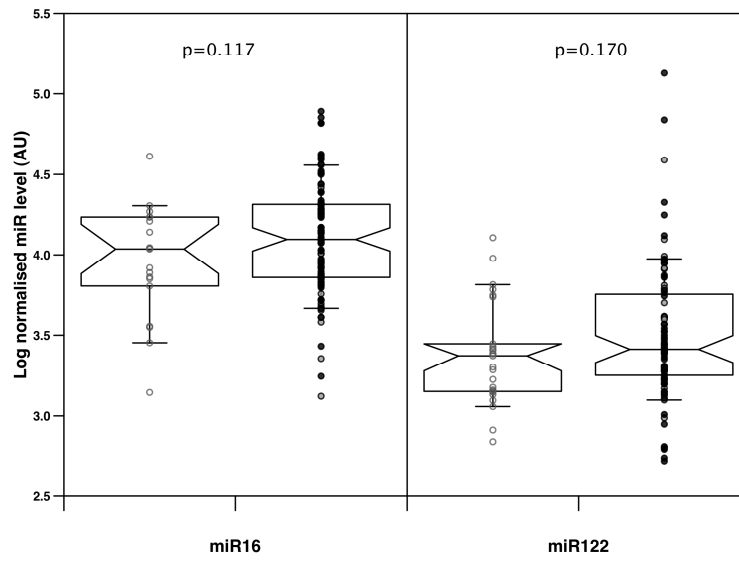

Donaldson Fig S2

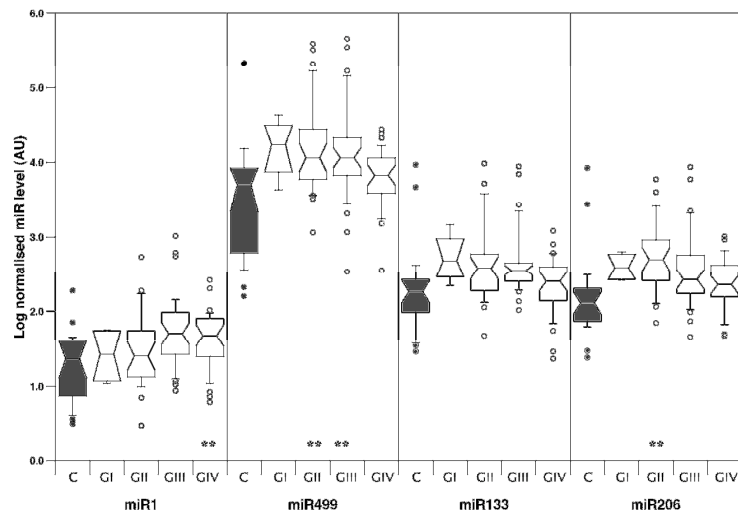

Donaldson Fig S3

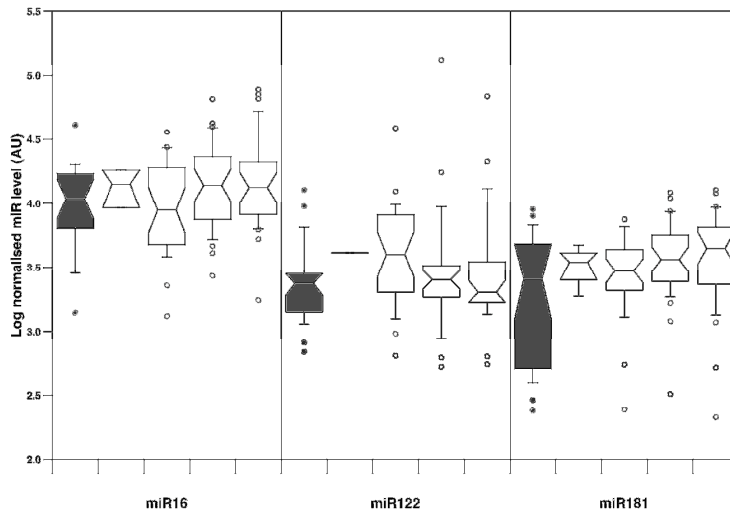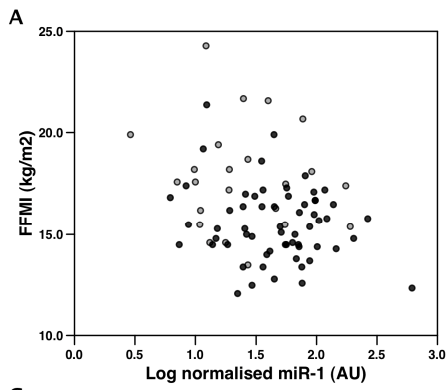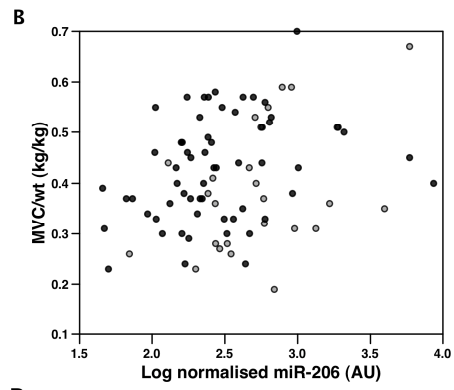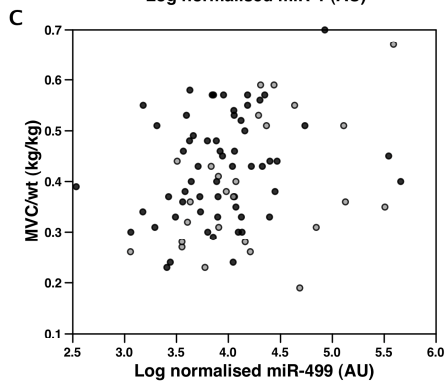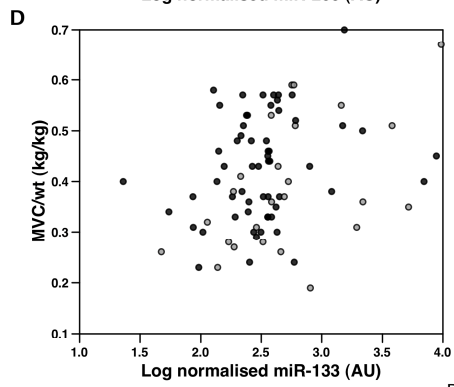

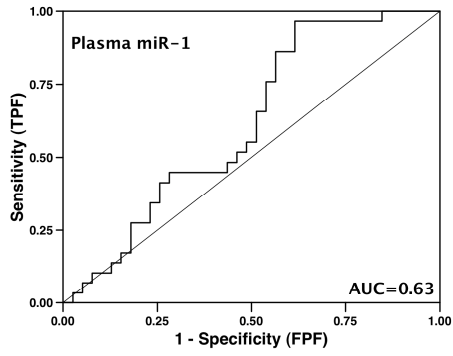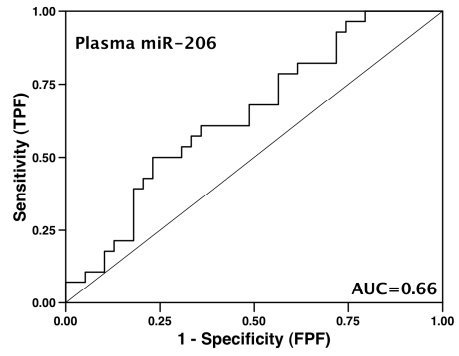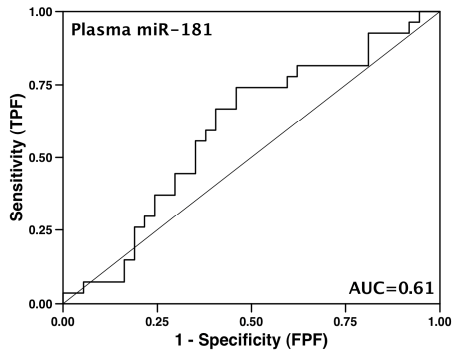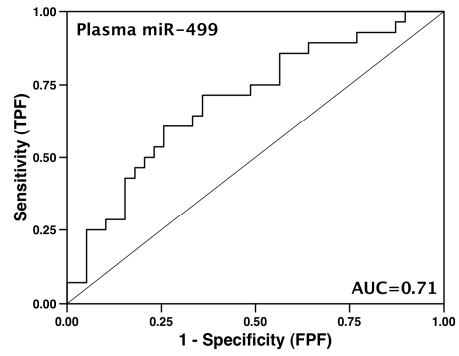

Donaldson Fig S6

Supplement: thoraxjnl-2012-203129supp_figures.pdf [file thoraxjnl-2012-203129supp_figures.pdf]
